# Supplementary material for: The covid-19 outbreak: a Chinese school student’s life in isolation for 73 days
Source: PubMed Central journal article supplement — BMJ Paediatr Open. 2020 May 6;4(1):e000699. doi: 10.1136/bmjpo-2020-000699 (PMC7223346; doi:10.1136/bmjpo-2020-000699), 2020-05-06
Supplement: bmjpo-2020-000699.reviewer_comments.pdf [file bmjpo-2020-000699.reviewer_comments.pdf]

## PEER REVIEW HISTORY

BMJ Paediatrics Open publishes all reviews undertaken for accepted manuscripts. Reviewers are asked to complete a checklist review form and are provided with free text boxes to elaborate on their assessment. These free text comments are reproduced below.

**No Peer review for this paper**
